# Supplementary material for: Synthesis of pentameric chlorotin carboxylate clusters for high resolution EUV photoresists under small doses
Source: PubMed Central journal article supplement (PMC11134253; doi:10.1039/d4na00006d), 2024-04-09
Supplement: NA-006-D4NA00006D-s001.pdf [file NA-006-D4NA00006D-s001.pdf]

## *Supporting Information*

### **Synthesis of Pentameric Chlorotin Carboxylate Clusters for High Resolution EUV Photoresists Under Small Doses**

Cheng-Dun Li,<sup>a</sup> Ting-An Lin,<sup>a</sup> Po-Hsiung Chen,<sup>b</sup> Tsi-Sheng Gau,<sup>b,c</sup> Burn-Jeng Lin,<sup>b,c</sup> and Jui-Hsiung Liu<sup>\*a</sup>

Keywords: Pentameric chlorotin carboxylate clusters, negative-tone photoresists, high resolution patterns, e-beam and EUV lithography, FTIR and HRXPS studies

Department of Chemistry,<sup>a</sup> TSMC-NTHU Joint Research Center,<sup>b</sup> College of Semiconductor Research<sup>c</sup>, National Tsing Hua University, Hsinchu 30013, Taiwan  
e-mail: rslu@mx.nthu.edu.tw

#### Content:

|                                                                                                  |    |
|--------------------------------------------------------------------------------------------------|----|
| 1. Representative Synthetic procedures -----                                                     | 1  |
| 2. SEM images for e-beam lithography patterns -----                                              | 2  |
| 3. SEM images for EUV lithography patterns -----                                                 | 5  |
| 4. Spectral data of key compounds -----                                                          | 11 |
| 5. X-ray crystallographic data of cluster 1 -----                                                | 11 |
| 6. <sup>1</sup> H, <sup>13</sup> C and <sup>119</sup> Sn NMR of cluster 1 -----                  | 26 |
| 7. <sup>1</sup> H, <sup>13</sup> C, <sup>19</sup> F and <sup>119</sup> Sn NMR of cluster 2 ----- | 29 |

## 1. Representative synthetic procedures

Unless otherwise noted, all reactions were carried out under nitrogen atmosphere in oven-dried glassware using standard syringe, cannula and septa apparatus. Dichloromethane and toluene were dried over CaH<sub>2</sub> and distilled. Reagents were purchased from commercial sources and used without purification, unless otherwise stated. <sup>1</sup>H NMR and <sup>13</sup>C NMR spectra were recorded on a Bruker 400 MHz and Bruker 500 MHz spectrometers using chloroform-d (CDCl<sub>3</sub>) as the internal standard. The ESI-Mass were performed using JEOL JMS-700. The EA analysis was performed by elemental vario EL cube. The TGA were performed using Mettler-Toledo 2-HT. FTIR Spectroscopy of power samples was in a Bruker Vertex 80v spectrometer. The AFM measurements were using SEIKO SPA-300HV. Electron-beam lithography was done by utilizing Elionix ELS-7800 with an accelerating voltage of 80 kV and a beam current of 200 pA. The EUV-IL system at the Swiss Light Sources (SLS), Paul Scherrer Institute, utilizes 13.5 nm EUV light. HRXPS measurements were performed in a ULVAC-PHI Quantera II, with a monochromatic Al K $\alpha$  source (energy of 1486.7 eV).

## 2. SEM image of E-beam lithography patterns

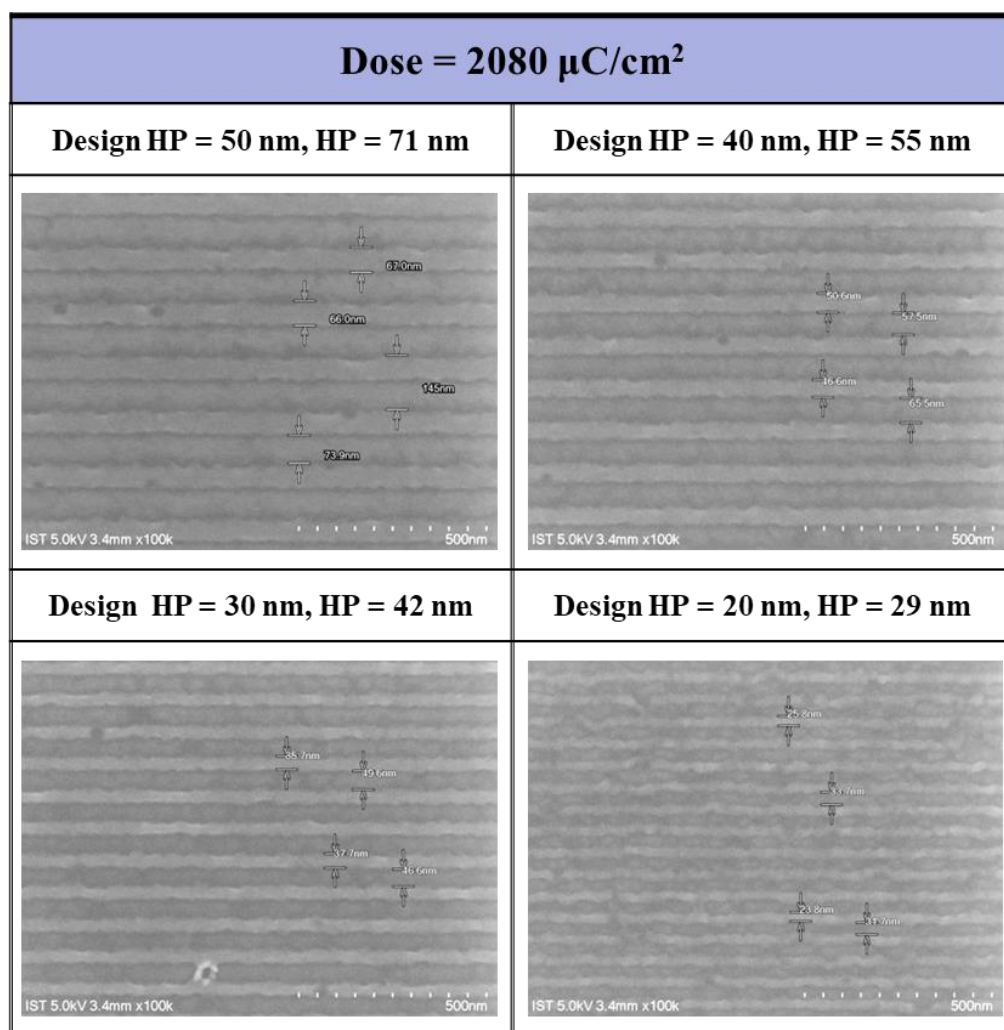

| Dose<br>HP           | Dose = 2440 $\mu\text{C}/\text{cm}^2$ ,<br>HP = 64 nm                               | Dose = 2720 $\mu\text{C}/\text{cm}^2$ ,<br>HP = 69 nm                                |
|----------------------|-------------------------------------------------------------------------------------|--------------------------------------------------------------------------------------|
| Design<br>HP = 50 nm | 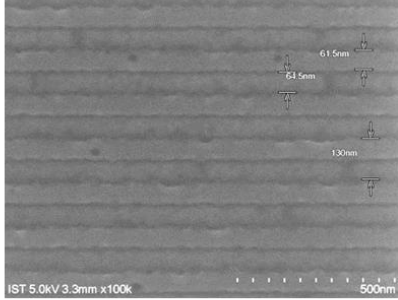   |    |
|                      | Dose = 2440 $\mu\text{C}/\text{cm}^2$ ,<br>HP = 56 nm                               | Dose = 2720 $\mu\text{C}/\text{cm}^2$ ,<br>HP = 54 nm                                |
| Design<br>HP = 40 nm |   |   |
|                      | Dose = 2440 $\mu\text{C}/\text{cm}^2$ ,<br>HP = 40 nm                               | Dose = 2720 $\mu\text{C}/\text{cm}^2$ ,<br>HP = 39 nm                                |
| Design<br>HP = 30 nm |  |  |
|                      | Dose = 2440 $\mu\text{C}/\text{cm}^2$ ,<br>HP = 27 nm                               | Dose = 2720 $\mu\text{C}/\text{cm}^2$ ,<br>HP = 27 nm                                |
| Design<br>HP = 20 nm |  |  |

Figure S1. SEM images of E-beam lithography patterns on photoresist 3. Process parameter: 1.5 wt%, thickness 22.3 nm, Developer: 2-Heptanone 60 s, no PEB. (Dose = 2080, 2440 and 2720  $\mu\text{C}/\text{cm}^2$ ).

| Dose<br>HP           | Dose = 800 $\mu\text{C}/\text{cm}^2$                                                | Dose = 1120 $\mu\text{C}/\text{cm}^2$ ,<br>HP = 54 nm                                |
|----------------------|-------------------------------------------------------------------------------------|--------------------------------------------------------------------------------------|
| Design<br>HP = 50 nm | 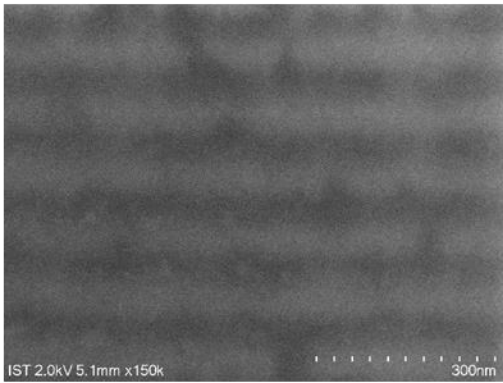   |    |
|                      | Dose = 800 $\mu\text{C}/\text{cm}^2$                                                | Dose = 1120 $\mu\text{C}/\text{cm}^2$                                                |
| Design<br>HP = 40 nm |   |   |
|                      |                                                                                     | Dose = 1120 $\mu\text{C}/\text{cm}^2$                                                |
| Design<br>HP = 30 nm |  |  |

| Dose<br>HP           | Dose = 1440 $\mu\text{C}/\text{cm}^2$ ,<br>HP = 52 nm | Dose = 2440 $\mu\text{C}/\text{cm}^2$ ,<br>HP = 51 nm |
|----------------------|-------------------------------------------------------|-------------------------------------------------------|
| Design<br>HP = 50 nm |                                                       |                                                       |
|                      | Dose = 1440 $\mu\text{C}/\text{cm}^2$ ,<br>HP = 41 nm | Dose = 2440 $\mu\text{C}/\text{cm}^2$ ,<br>HP = 42 nm |
| Design<br>HP = 40 nm |                                                       |                                                       |
|                      | Dose = 1440 $\mu\text{C}/\text{cm}^2$ ,<br>HP = 30 nm | Dose = 2440 $\mu\text{C}/\text{cm}^2$ ,<br>HP = 31 nm |
| Design<br>HP = 30 nm |                                                       |                                                       |
|                      | Dose = 1440 $\mu\text{C}/\text{cm}^2$                 | Dose = 2440 $\mu\text{C}/\text{cm}^2$ ,<br>HP = 20 nm |
| Design<br>HP = 20 nm |                                                       |                                                       |

Figure S2. SEM images of E-beam lithography patterns on photoresist 3. Process parameter: 1.5 wt%, thickness 22.3 nm, Developer: 2-heptanone 60 s, PEB =80 °C, 60 s. (Dose = 800-2400  $\mu\text{C}/\text{cm}^2$ ).

**(3). SEM images of the EUV lithographic patterns**

| PAB = 80 °C 60 s, PEB = 160 °C 60 s                                                 |                                                                                      |
|-------------------------------------------------------------------------------------|--------------------------------------------------------------------------------------|
| HP = 16 nm, Dose = 207 mJ/cm <sup>2</sup>                                           | HP = 16 nm, Dose = 261 mJ/cm <sup>2</sup>                                            |
| 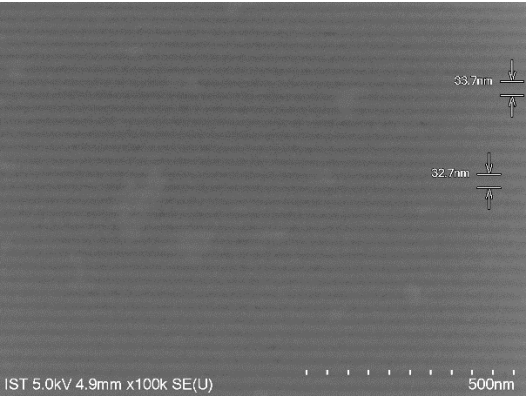   |    |
| HP = 15 nm, Dose = 205 mJ/cm <sup>2</sup>                                           | HP = 15 nm, Dose = 258 mJ/cm <sup>2</sup>                                            |
|   |   |
| HP = 14 nm, Dose = 216 mJ/cm <sup>2</sup>                                           | HP = 14 nm, Dose = 273 mJ/cm <sup>2</sup>                                            |
|  |  |
| HP = 13 nm, Dose = 205 mJ/cm <sup>2</sup>                                           | HP = 14 nm, Dose = 260 mJ/cm <sup>2</sup>                                            |

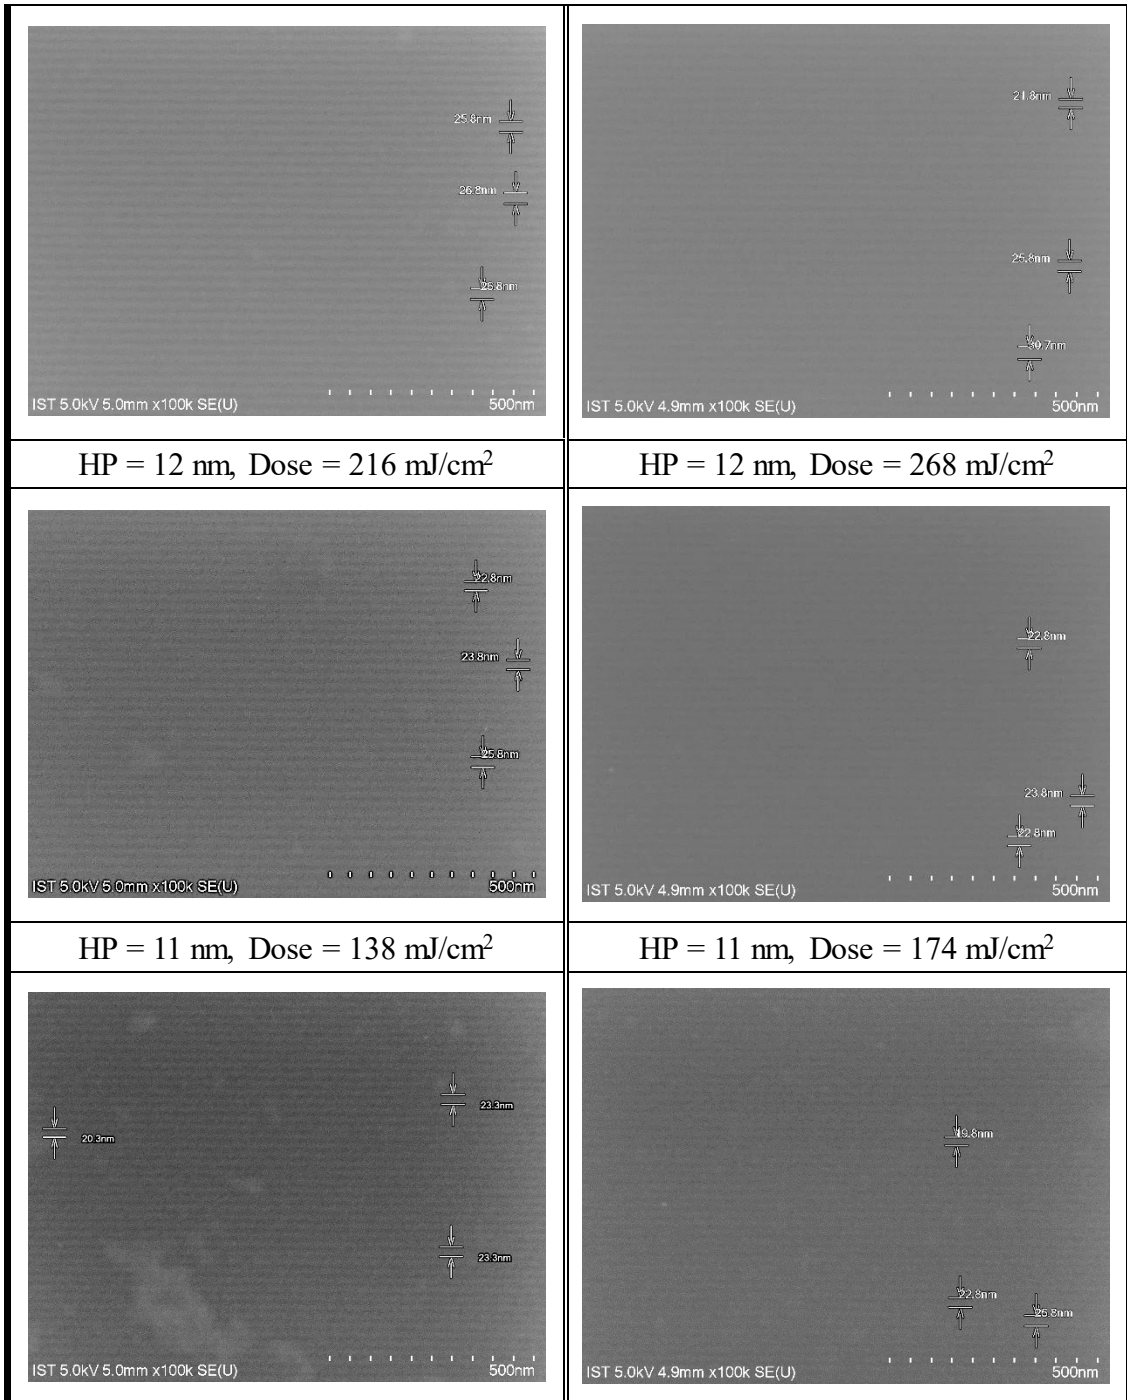

Figure S3. SEM images of EUV lithography patterns on photoresist (2') HP= 11-16 nm at different dose. Process parameter: 1.5 wt%, thickness 25.0 nm, Developer: 2-Heptanone 60 s, PEB= 160°C, 60 s.

| Dose<br>HP           | Dose = 77 mJ/cm <sup>2</sup> ,<br>HP = 50 nm                                        | Dose = 88 mJ/cm <sup>2</sup><br>HP = 50 nm                                           |
|----------------------|-------------------------------------------------------------------------------------|--------------------------------------------------------------------------------------|
| Design<br>HP = 50 nm | 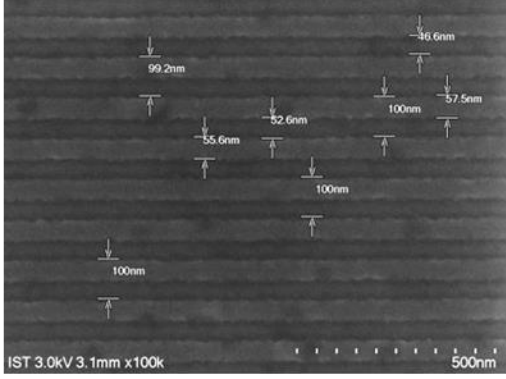   |    |
|                      | Dose = 70 mJ/cm <sup>2</sup> ,<br>HP = 35 nm                                        | Dose = 80 mJ/cm <sup>2</sup><br>HP = 35 nm                                           |
| Design<br>HP = 35 nm |   |   |
|                      | Dose = 64 mJ/cm <sup>2</sup> ,<br>HP = 25 nm                                        | Dose = 66 mJ/cm <sup>2</sup><br>HP = 25 nm                                           |
| Design<br>HP = 25 nm |  |  |



| Dose<br>HP           | Dose = 63 mJ/cm <sup>2</sup> ,<br>HP = 22 nm | Dose = 66 mJ/cm <sup>2</sup> ,<br>HP = 22 nm |
|----------------------|----------------------------------------------|----------------------------------------------|
| Design<br>HP = 22 nm | <p>IST 3.0kV 3.1mm x100k 500nm</p>           | <p>IST 3.0kV 3.1mm x100k 500nm</p>           |
|                      | Dose = 69 mJ/cm <sup>2</sup> ,<br>HP = 18 nm | Dose = 66 mJ/cm <sup>2</sup>                 |
| Design<br>HP = 18 nm | <p>IST 3.0kV 3.1mm x100k 500nm</p>           | <p>IST 3.0kV 3.1mm x100k 500nm</p>           |
|                      | Dose = 70 mJ/cm <sup>2</sup> ,<br>HP = 16 nm | Dose = 66mJ/cm <sup>2</sup>                  |
| Design<br>HP = 16 nm | <p>IST 3.0kV 3.1mm x100k 500nm</p>           | <p>IST 3.0kV 3.1mm x100k 500nm</p>           |

| Dose<br>HP           | Dose = 66 mJ/cm <sup>2</sup> ,<br>HP = 51 nm | Dose = 60 mJ/cm <sup>2</sup> ,<br>HP = 35 nm | Dose<br>HP           |
|----------------------|----------------------------------------------|----------------------------------------------|----------------------|
| Design<br>HP = 50 nm |                                              |                                              | Design<br>HP = 35 nm |
|                      | Dose = 55 mJ/cm <sup>2</sup> ,<br>HP = 26 nm | Dose = 54 mJ/cm <sup>2</sup> ,<br>HP = 22 nm |                      |
| Design<br>HP = 25 nm |                                              |                                              | Design<br>HP = 22 nm |

| Dose<br>HP           | Dose = 82 mJ/cm <sup>2</sup> ,<br>HP = 26 nm | Dose = 82 mJ/cm <sup>2</sup> ,<br>HP = 23 nm | Dose<br>HP           |
|----------------------|----------------------------------------------|----------------------------------------------|----------------------|
| Design<br>HP = 25 nm |                                              |                                              | Design<br>HP = 22 nm |
|                      | Dose = 89 mJ/cm <sup>2</sup> ,<br>HP = 19 nm | Dose = 90 mJ/cm <sup>2</sup> ,<br>HP = 17 nm |                      |
| Design<br>HP = 18 nm |                                              |                                              | Design<br>HP = 16 nm |

Figure S4. SEM images of EUV lithography patterns on photoresist **3** with HP= 50, 35, 25, 22, 18, 16 nm at different dose. Process parameter: 1.5 wt%, thickness 22.3 nm, Developer: 2-Heptanone 60 s, PEB= 80°C, 60 s.(dose = 60-90 mJ/cm<sup>2</sup>).

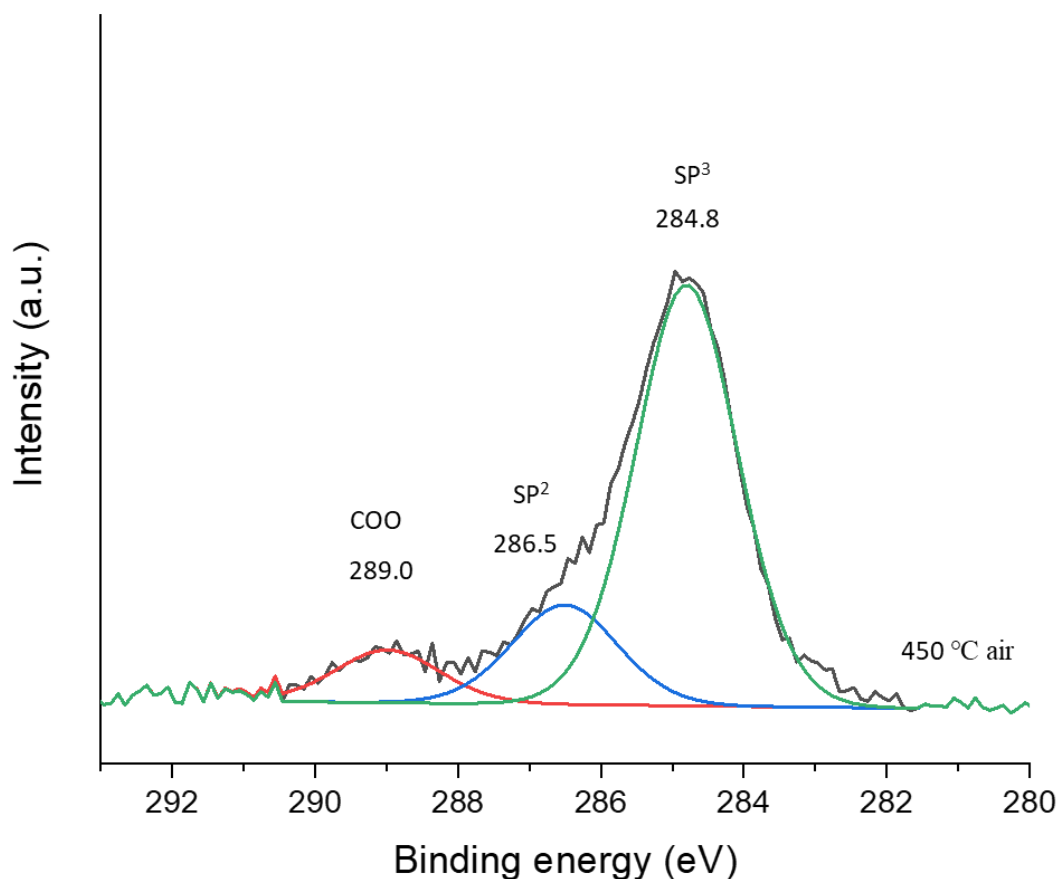

Figure s5.. Band-shape fitting spectra of the C\1s) component of the TGA residues after heating at 450 °C.

#### 4. Spectral data of key compounds.

##### cluster 1:

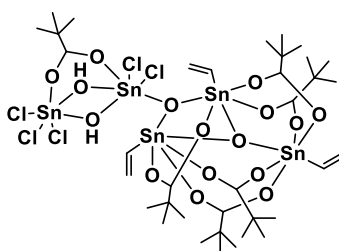

Cluster 1 was purified on recrystallization using DCM/hexane in low temperature.  $^1\text{H}$  NMR (400 MHz,  $\text{CDCl}_3$ ):  $\delta$  6.14-6.57 (m, 3 H), 1.22 (s, 18H);  $^{13}\text{C}$  NMR (125 MHz,  $\text{CDCl}_3$ ):  $\delta$  184.8, 139.6, 134.2, 123.0, 38.5, 29.7, 27.3, 27.2, 27.0;  $^{119}\text{Sn}$  NMR (186 MHz,  $\text{CDCl}_3$ ):  $\delta$  -32.2. EA. calc. for  $\text{C}_{36}\text{H}_{65}\text{Cl}_5\text{O}_{16}\text{Sn}_5$ . C, 28.36%; H, 4.30%; O, 16.79%. found: C, 29.39%; H, 4.42%; O, 16.89%.

#### 5. X-ray crystallographic data of cluster 1.

Ellipsoid contour % probability level = 50%

Experimental: The sample was dissolved in appropriate amount of DCM followed by the addition of *n*-hexane to furnish a saturated solution. Afterwards, the mixture was allowed to stand at low temperature (-4 °C) to form the crystals.

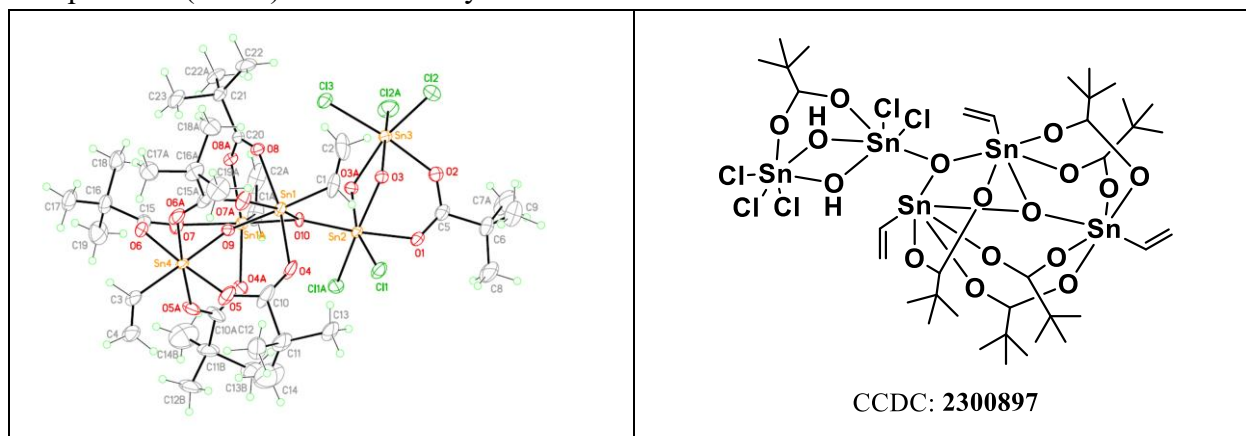

ORTEP diagram of cluster 1

**Table s1 Crystal data and structure refinement for 221175lt\_auto.**

|                                        |                                                                                 |
|----------------------------------------|---------------------------------------------------------------------------------|
| Identification code                    | 221175lt_auto                                                                   |
| Empirical formula                      | C <sub>36</sub> H <sub>63</sub> Cl <sub>5</sub> O <sub>16</sub> Sn <sub>5</sub> |
| Formula weight                         | 1522.56                                                                         |
| Temperature/K                          | 100.01(10)                                                                      |
| Crystal system                         | monoclinic                                                                      |
| Space group                            | P2 <sub>1</sub> /m                                                              |
| <i>a</i> /Å                            | 11.92010(10)                                                                    |
| <i>b</i> /Å                            | 16.4662(2)                                                                      |
| <i>c</i> /Å                            | 14.64400(10)                                                                    |
| $\alpha$ /°                            | 90                                                                              |
| $\beta$ /°                             | 103.9010(10)                                                                    |
| $\gamma$ /°                            | 90                                                                              |
| Volume/Å <sup>3</sup>                  | 2790.12(5)                                                                      |
| <i>Z</i>                               | 2                                                                               |
| $\rho_{\text{calc}}$ /cm <sup>3</sup>  | 1.812                                                                           |
| $\mu$ /mm <sup>-1</sup>                | 20.239                                                                          |
| <i>F</i> (000)                         | 1484.0                                                                          |
| Crystal size/mm <sup>3</sup>           | 0.12 × 0.1 × 0.05                                                               |
| Radiation                              | Cu K $\alpha$ ( $\lambda$ = 1.54184)                                            |
| 2 $\theta$ range for data collection/° | 6.218 to 134.146                                                                |
| Index ranges                           | -14 ≤ <i>h</i> ≤ 14, -19 ≤ <i>k</i> ≤ 19, -17 ≤ <i>l</i> ≤ 11                   |

Reflections collected 20553  
 Independent reflections 5167 [ $R_{\text{int}} = 0.0471$ ,  $R_{\text{sigma}} = 0.0272$ ]  
 Data/restraints/parameters 5167/258/406  
 Goodness-of-fit on  $F^2$  1.090  
 Final R indexes [ $I \geq 2\sigma(I)$ ]  $R_1 = 0.0595$ ,  $wR_2 = 0.1573$   
 Final R indexes [all data]  $R_1 = 0.0608$ ,  $wR_2 = 0.1584$   
 Largest diff. peak/hole /  $e \text{ \AA}^{-3}$  2.60/-2.47

**Table s2 Fractional Atomic Coordinates ( $\times 10^4$ ) and Equivalent Isotropic Displacement Parameters ( $\text{\AA}^2 \times 10^3$ ) for 221175lt\_auto.  $U_{\text{eq}}$  is defined as 1/3 of the trace of the orthogonalised  $U_{\text{IJ}}$  tensor.**

| Atom | x           | y           | z           | U(eq)     |
|------|-------------|-------------|-------------|-----------|
| C1   | 3684 (11)   | 2500        | 2330 (9)    | 48 (4)    |
| C2   | 2491 (17)   | 2500        | 1684 (14)   | 77 (5)    |
| C3   | 1570 (14)   | 2500        | 2180 (13)   | 78 (5)    |
| C5   | 7208 (8)    | 4456 (6)    | 5213 (7)    | 47 (2)    |
| C6   | 7754 (9)    | 4674 (7)    | 4581 (8)    | 59 (3)    |
| C7   | 9607 (9)    | 2500        | 5503 (7)    | 27 (2)    |
| C8   | 10773 (9)   | 2500        | 5277 (8)    | 36 (3)    |
| C9   | 10950 (8)   | 1732 (7)    | 4736 (7)    | 48 (2)    |
| C10  | 11663 (11)  | 2500        | 6248 (10)   | 64 (5)    |
| C11  | 9704 (7)    | 4040 (6)    | 7825 (6)    | 39 (2)    |
| C16  | 9062 (12)   | 2500        | 9896 (9)    | 51 (3)    |
| C17  | 8475 (12)   | 2500        | 10440 (9)   | 58 (4)    |
| C18  | 6524 (9)    | 3745 (11)   | 7783 (7)    | 81 (5)    |
| Cl1  | 4412.3 (17) | 1413.4 (15) | 4988.0 (14) | 40.1 (5)  |
| Cl2  | 8319 (2)    | 2500        | 3206.0 (19) | 42.3 (7)  |
| Cl3  | 6417 (2)    | 1391.3 (18) | 1447.8 (16) | 52.8 (6)  |
| O1   | 3776 (7)    | 2500        | 3203 (5)    | 37 (2)    |
| O2   | 4518 (7)    | 2500        | 1914 (5)    | 43 (2)    |
| O3   | 9174 (4)    | 3177 (4)    | 5619 (4)    | 29.9 (12) |
| O4   | 8880 (5)    | 4183 (4)    | 7136 (4)    | 40.2 (14) |

**Table s2 Fractional Atomic Coordinates ( $\times 10^4$ ) and Equivalent Isotropic Displacement Parameters ( $\text{\AA}^2 \times 10^3$ ) for 221175lt\_auto.  $U_{eq}$  is defined as 1/3 of the trace of the orthogonalised  $U_{ij}$  tensor.**

| Atom | x          | y          | z          | U(eq)      |
|------|------------|------------|------------|------------|
| O5   | 9825 (5)   | 3403 (4)   | 8320 (4)   | 39.6 (15)  |
| O6   | 7298 (6)   | 3402 (6)   | 8376 (4)   | 68 (3)     |
| O7   | 6456 (5)   | 3760 (5)   | 6903 (4)   | 49.3 (18)  |
| O8   | 6772 (6)   | 2500       | 5381 (5)   | 27.9 (17)  |
| O9   | 8168 (6)   | 2500       | 7003 (5)   | 25.9 (16)  |
| O10  | 5918 (4)   | 1728 (4)   | 3478 (3)   | 30.7 (12)  |
| Sn1  | 7677.8 (4) | 3470.7 (3) | 6125.4 (3) | 28.09 (19) |
| Sn2  | 5248.4 (6) | 2500       | 4354.1 (4) | 26.9 (2)   |
| Sn3  | 6322.1 (6) | 2500       | 2446.3 (5) | 29.8 (2)   |
| Sn4  | 8583.9 (6) | 2500       | 8410.9 (5) | 37.4 (3)   |
| C12  | 10627 (17) | 4630 (15)  | 8207 (14)  | 45 (3)     |
| C13  | 10471 (19) | 5321 (14)  | 7494 (15)  | 62 (4)     |
| C14  | 11810 (15) | 4252 (14)  | 8370 (18)  | 55 (4)     |
| C15  | 10471 (18) | 4942 (14)  | 9148 (14)  | 55 (4)     |
| C19  | 5840 (16)  | 4543 (15)  | 8001 (14)  | 60 (4)     |
| C20  | 6350 (20)  | 5368 (18)  | 7910 (20)  | 88 (7)     |
| C21  | 5670 (20)  | 4290 (20)  | 9048 (15)  | 64 (5)     |
| C22  | 4500 (20)  | 4300 (20)  | 7430 (20)  | 70 (6)     |
| C12A | 10664 (19) | 4749 (14)  | 8008 (14)  | 45 (3)     |
| C13A | 11147 (18) | 4859 (14)  | 7131 (13)  | 49 (4)     |
| C14A | 11628 (17) | 4529 (15)  | 8832 (14)  | 49 (4)     |
| C15A | 10094 (19) | 5545 (14)  | 8161 (16)  | 57 (4)     |
| C19A | 5415 (18)  | 3922 (15)  | 8175 (15)  | 66 (4)     |
| C20A | 4830 (30)  | 3200 (19)  | 8470 (30)  | 100 (7)    |
| C21A | 6020 (30)  | 4570 (20)  | 9018 (17)  | 68 (6)     |
| C22A | 4740 (20)  | 4619 (18)  | 7410 (20)  | 64 (6)     |
| C4A  | 2410 (19)  | 2190 (20)  | 743 (16)   | 96 (11)    |
| C4   | 2450 (30)  | 1410 (30)  | 1470 (30)  | 110 (12)   |

**Table s3 Anisotropic Displacement Parameters ( $\text{\AA}^2 \times 10^3$ ) for 221175lt\_auto. The Anisotropic displacement factor exponent takes the form:  $-2\pi^2[h^2a^{*2}U_{11}+2hka^*b^*U_{12}+\dots]$ .**

| Atom | $U_{11}$  | $U_{22}$  | $U_{33}$  | $U_{23}$   | $U_{13}$   | $U_{12}$  |
|------|-----------|-----------|-----------|------------|------------|-----------|
| C1   | 23 (6)    | 96 (12)   | 23 (6)    | 0          | 2 (5)      | 0         |
| C2   | 57 (8)    | 117 (10)  | 56 (8)    | 0          | 9 (7)      | 0         |
| C3   | 33 (8)    | 133 (14)  | 59 (10)   | 0          | -3 (7)     | 0         |
| C5   | 30 (5)    | 50 (6)    | 49 (6)    | -3 (5)     | -14 (4)    | 8 (4)     |
| C6   | 43 (6)    | 55 (6)    | 64 (7)    | 25 (5)     | -18 (5)    | -12 (5)   |
| C7   | 24 (5)    | 40 (6)    | 12 (4)    | 0          | -4 (4)     | 0         |
| C8   | 15 (5)    | 74 (9)    | 18 (5)    | 0          | 0 (4)      | 0         |
| C9   | 29 (5)    | 74 (7)    | 44 (5)    | 12 (5)     | 18 (4)     | 18 (5)    |
| C10  | 17 (6)    | 136 (16)  | 32 (7)    | 0          | -7 (5)     | 0         |
| C11  | 23 (4)    | 65 (6)    | 26 (4)    | -16 (4)    | 1 (3)      | 9 (4)     |
| C16  | 26 (5)    | 96 (8)    | 28 (6)    | 0          | -1 (5)     | 0         |
| C17  | 32 (7)    | 121 (12)  | 24 (6)    | 0          | 11 (5)     | 0         |
| C18  | 32 (5)    | 178 (15)  | 27 (5)    | -40 (7)    | -7 (4)     | 39 (7)    |
| Cl1  | 23.8 (9)  | 66.8 (14) | 28.0 (10) | 7.9 (9)    | 2.8 (8)    | -7.8 (9)  |
| Cl2  | 23.5 (13) | 80 (2)    | 20.6 (13) | 0          | 0.8 (10)   | 0         |
| Cl3  | 41.3 (12) | 85.2 (18) | 31.6 (11) | -17.8 (11) | 8.4 (9)    | -2.2 (12) |
| O1   | 20 (4)    | 70 (6)    | 17 (4)    | 0          | -1 (3)     | 0         |
| O2   | 23 (4)    | 88 (7)    | 14 (4)    | 0          | -5 (3)     | 0         |
| O3   | 21 (3)    | 50 (3)    | 18 (2)    | 4 (2)      | 3 (2)      | 1 (2)     |
| O4   | 25 (3)    | 51 (4)    | 37 (3)    | -14 (3)    | -7 (3)     | 2 (3)     |
| O5   | 20 (3)    | 74 (5)    | 21 (3)    | -8 (3)     | -2 (2)     | 4 (3)     |
| O6   | 33 (4)    | 148 (8)   | 19 (3)    | -24 (4)    | 0 (3)      | 28 (4)    |
| O7   | 22 (3)    | 93 (5)    | 26 (3)    | -22 (3)    | -7 (2)     | 16 (3)    |
| O8   | 24 (4)    | 48 (5)    | 8 (3)     | 0          | -3 (3)     | 0         |
| O9   | 11 (3)    | 51 (5)    | 15 (3)    | 0          | 2 (3)      | 0         |
| O10  | 20 (3)    | 55 (4)    | 15 (2)    | 1 (2)      | 1 (2)      | 1 (2)     |
| Sn1  | 18.9 (3)  | 46.2 (4)  | 16.5 (3)  | -3.1 (2)   | -0.98 (19) | 3.5 (2)   |
| Sn2  | 15.0 (3)  | 51.0 (5)  | 13.2 (3)  | 0          | 0.1 (3)    | 0         |
| Sn3  | 21.4 (4)  | 53.5 (5)  | 14.0 (3)  | 0          | 3.2 (3)    | 0         |
| Sn4  | 13.1 (3)  | 89.6 (7)  | 8.4 (3)   | 0          | 0.2 (2)    | 0         |
| C12  | 32 (5)    | 61 (7)    | 40 (7)    | -9 (5)     | 3 (5)      | -11 (6)   |
| C13  | 50 (8)    | 71 (9)    | 56 (8)    | 2 (7)      | -4 (7)     | -19 (7)   |



**Table s3 Anisotropic Displacement Parameters ( $\text{\AA}^2 \times 10^3$ ) for 221175lt\_auto. The Anisotropic displacement factor exponent takes the form:  $-2\pi^2[h^2a^{*2}U_{11}+2hka^*b^*U_{12}+\dots]$ .**

| Atom | U <sub>11</sub> | U <sub>22</sub> | U <sub>33</sub> | U <sub>23</sub> | U <sub>13</sub> | U <sub>12</sub> |
|------|-----------------|-----------------|-----------------|-----------------|-----------------|-----------------|
| C14  | 26 (7)          | 71 (10)         | 61 (10)         | -14 (8)         | -1 (7)          | -13 (6)         |
| C15  | 48 (8)          | 69 (9)          | 46 (7)          | -13 (7)         | 4 (7)           | -8 (7)          |
| C19  | 35 (7)          | 100 (11)        | 47 (7)          | -15 (8)         | 12 (6)          | 21 (7)          |
| C20  | 67 (13)         | 100 (14)        | 99 (15)         | -2 (12)         | 26 (12)         | 17 (10)         |
| C21  | 35 (10)         | 116 (14)        | 44 (7)          | -13 (9)         | 15 (7)          | 28 (9)          |
| C22  | 33 (9)          | 116 (15)        | 56 (8)          | -26 (11)        | 0 (8)           | 32 (9)          |
| C12A | 33 (6)          | 61 (7)          | 37 (7)          | -9 (6)          | 3 (5)           | -12 (6)         |
| C13A | 45 (8)          | 64 (9)          | 37 (7)          | -4 (7)          | 7 (6)           | -21 (7)         |
| C14A | 34 (7)          | 70 (9)          | 38 (7)          | -1 (7)          | 1 (6)           | -25 (7)         |
| C15A | 55 (8)          | 63 (8)          | 51 (9)          | -8 (7)          | 8 (7)           | -12 (7)         |
| C19A | 37 (8)          | 108 (12)        | 55 (7)          | -20 (8)         | 13 (6)          | 24 (7)          |
| C20A | 71 (14)         | 122 (16)        | 115 (17)        | -7 (12)         | 35 (13)         | 12 (11)         |
| C21A | 55 (12)         | 113 (14)        | 38 (8)          | -14 (9)         | 13 (8)          | 30 (9)          |
| C22A | 29 (9)          | 109 (14)        | 51 (8)          | -30 (10)        | 1 (8)           | 25 (9)          |
| C4A  | 36 (10)         | 180 (30)        | 56 (12)         | -44 (14)        | -24 (9)         | 1 (13)          |
| C4   | 53 (14)         | 170 (30)        | 90 (17)         | -41 (18)        | -13 (14)        | -21 (16)        |

**Table s4 Bond Lengths for 221175lt\_auto.**

| Atom | Atom            | Length/ $\text{\AA}$ | Atom | Atom             | Length/ $\text{\AA}$ |
|------|-----------------|----------------------|------|------------------|----------------------|
| C1   | C2              | 1.51 (2)             | O2   | Sn3              | 2.104 (8)            |
| C1   | O1              | 1.257 (15)           | O3   | Sn1              | 2.145 (5)            |
| C1   | O2              | 1.285 (15)           | O4   | Sn1              | 2.145 (6)            |
| C2   | C3              | 1.45 (3)             | O5   | Sn4              | 2.124 (7)            |
| C2   | C4A             | 1.45 (3)             | O6   | Sn4              | 2.126 (8)            |
| C2   | C4              | 1.82 (4)             | O7   | Sn1              | 2.108 (6)            |
| C5   | C6              | 1.304 (16)           | O8   | Sn1 <sup>1</sup> | 2.084 (4)            |
| C5   | Sn1             | 2.091 (10)           | O8   | Sn1              | 2.084 (4)            |
| C7   | C8              | 1.503 (15)           | O8   | Sn2              | 2.061 (7)            |
| C7   | O3 <sup>1</sup> | 1.258 (8)            | O9   | Sn1 <sup>1</sup> | 2.047 (4)            |
| C7   | O3              | 1.258 (8)            | O9   | Sn1              | 2.047 (4)            |
| C8   | C9 <sup>1</sup> | 1.534 (13)           | O9   | Sn4              | 2.001 (7)            |

**Table s4 Bond Lengths for 221175lt\_auto.**

| Atom | Atom | Length/Å   | Atom     | Atom             | Length/Å    |
|------|------|------------|----------|------------------|-------------|
| C8   | C9   | 1.534 (12) | O10      | Sn2              | 2.095 (6)   |
| C8   | C10  | 1.556 (16) | O10      | Sn3              | 2.116 (6)   |
| C11  | O4   | 1.250 (10) | Sn1      | Sn1 <sup>1</sup> | 3.1967 (11) |
| C11  | O5   | 1.264 (12) | C12      | C13              | 1.53 (2)    |
| C11  | C12  | 1.47 (3)   | C12      | C14              | 1.51 (2)    |
| C11  | C12A | 1.61 (3)   | C12      | C15              | 1.52 (2)    |
| C16  | C17  | 1.18 (2)   | C19      | C20              | 1.51 (3)    |
| C16  | Sn4  | 2.112 (13) | C19      | C21              | 1.65 (2)    |
| C18  | O6   | 1.240 (14) | C19      | C22              | 1.66 (2)    |
| C18  | O7   | 1.272 (12) | C12AC13A |                  | 1.54 (2)    |
| C18  | C19  | 1.62 (2)   | C12AC14A |                  | 1.50 (2)    |
| C18  | C19A | 1.59 (2)   | C12AC15A |                  | 1.52 (2)    |
| C11  | Sn2  | 2.345 (2)  | C19AC20A |                  | 1.49 (3)    |
| C12  | Sn3  | 2.373 (3)  | C19AC21A |                  | 1.66 (2)    |
| C13  | Sn3  | 2.359 (3)  | C19AC22A |                  | 1.67 (3)    |
| O1   | Sn2  | 2.121 (7)  |          |                  |             |

<sup>1</sup>+X,1/2-Y,+Z

**Table s5 Bond Angles for 221175lt\_auto.**

| Atom            | Atom | Atom | Angle/°    | Atom             | Atom | Atom             | Angle/°     |
|-----------------|------|------|------------|------------------|------|------------------|-------------|
| O1              | C1   | C2   | 118.5 (13) | O8               | Sn2  | C11              | 95.45 (14)  |
| O1              | C1   | O2   | 126.5 (11) | O8               | Sn2  | C11 <sup>1</sup> | 95.45 (14)  |
| O2              | C1   | C2   | 115.0 (12) | O8               | Sn2  | O1               | 174.6 (3)   |
| C1              | C2   | C4   | 95.2 (12)  | O8               | Sn2  | O10 <sup>1</sup> | 92.8 (2)    |
| C3              | C2   | C1   | 113.4 (15) | O8               | Sn2  | O10              | 92.8 (2)    |
| C3              | C2   | C4   | 95.1 (15)  | O10              | Sn2  | C11              | 92.30 (17)  |
| C4A             | C2   | C1   | 115.8 (16) | O10 <sup>1</sup> | Sn2  | C11              | 164.94 (16) |
| C4A             | C2   | C3   | 126.1 (17) | O10              | Sn2  | C11 <sup>1</sup> | 164.94 (16) |
| C6              | C5   | Sn1  | 124.3 (8)  | O10 <sup>1</sup> | Sn2  | C11 <sup>1</sup> | 92.31 (17)  |
| O3              | C7   | C8   | 117.4 (5)  | O10 <sup>1</sup> | Sn2  | O1               | 83.0 (2)    |
| O3 <sup>1</sup> | C7   | C8   | 117.4 (5)  | O10              | Sn2  | O1               | 83.0 (2)    |

**Table s5 Bond Angles for 221175lt\_auto.**

| Atom             | Atom | Atom             | Angle/°     | Atom             | Atom | Atom             | Angle/°     |
|------------------|------|------------------|-------------|------------------|------|------------------|-------------|
| O3               | C7   | O3 <sup>1</sup>  | 125.0 (10)  | O10 <sup>1</sup> | Sn2  | O10              | 74.7 (3)    |
| C7               | C8   | C9 <sup>1</sup>  | 111.3 (6)   | CB <sup>1</sup>  | Sn3  | C12              | 95.65 (8)   |
| C7               | C8   | C9               | 111.3 (6)   | CB               | Sn3  | C12              | 95.65 (8)   |
| C7               | C8   | C10              | 105.2 (9)   | CB               | Sn3  | CB <sup>1</sup>  | 101.43 (14) |
| C9               | C8   | C9 <sup>1</sup>  | 111.1 (10)  | O2               | Sn3  | C12              | 174.0 (2)   |
| C9               | C8   | C10              | 108.9 (7)   | O2               | Sn3  | CB <sup>1</sup>  | 88.13 (15)  |
| C9 <sup>1</sup>  | C8   | C10              | 108.9 (7)   | O2               | Sn3  | CB               | 88.13 (15)  |
| O4               | C11  | O5               | 125.4 (9)   | O2               | Sn3  | O10 <sup>1</sup> | 82.9 (2)    |
| O4               | C11  | C12              | 123.6 (12)  | O2               | Sn3  | O10              | 82.9 (2)    |
| O4               | C11  | C12A             | 112.8 (11)  | O10 <sup>1</sup> | Sn3  | C12              | 92.30 (15)  |
| O5               | C11  | C12              | 110.9 (11)  | O10              | Sn3  | C12              | 92.30 (15)  |
| O5               | C11  | C12A             | 121.8 (9)   | O10              | Sn3  | CB <sup>1</sup>  | 163.82 (17) |
| C17              | C16  | Sn4              | 129.7 (12)  | O10              | Sn3  | CB               | 91.76 (17)  |
| O6               | C18  | O7               | 125.0 (9)   | O10 <sup>1</sup> | Sn3  | CB <sup>1</sup>  | 91.77 (17)  |
| O6               | C18  | C19              | 123.9 (11)  | O10 <sup>1</sup> | Sn3  | CB               | 163.81 (17) |
| O6               | C18  | C19A             | 112.0 (12)  | O10              | Sn3  | O10 <sup>1</sup> | 73.8 (3)    |
| O7               | C18  | C19              | 105.8 (13)  | C16              | Sn4  | O5 <sup>1</sup>  | 92.6 (3)    |
| O7               | C18  | C19A             | 120.4 (11)  | C16              | Sn4  | O5               | 92.6 (3)    |
| C1               | O1   | Sn2              | 131.4 (8)   | C16              | Sn4  | O6 <sup>1</sup>  | 92.3 (3)    |
| C1               | O2   | Sn3              | 131.5 (7)   | C16              | Sn4  | O6               | 92.3 (3)    |
| C7               | O3   | Sn1              | 130.5 (6)   | O5 <sup>1</sup>  | Sn4  | O5               | 88.9 (3)    |
| C11              | O4   | Sn1              | 136.0 (7)   | O5               | Sn4  | O6 <sup>1</sup>  | 175.2 (2)   |
| C11              | O5   | Sn4              | 129.2 (5)   | O5               | Sn4  | O6               | 91.0 (3)    |
| C18              | O6   | Sn4              | 138.2 (6)   | O5 <sup>1</sup>  | Sn4  | O6 <sup>1</sup>  | 91.0 (3)    |
| C18              | O7   | Sn1              | 131.2 (6)   | O5 <sup>1</sup>  | Sn4  | O6               | 175.2 (2)   |
| Sn1 <sup>1</sup> | O8   | Sn1              | 100.1 (3)   | O6               | Sn4  | O6 <sup>1</sup>  | 88.6 (5)    |
| Sn2              | O8   | Sn1 <sup>1</sup> | 129.55 (15) | O9               | Sn4  | C16              | 178.7 (4)   |
| Sn2              | O8   | Sn1              | 129.55 (15) | O9               | Sn4  | O5 <sup>1</sup>  | 86.5 (2)    |
| Sn1 <sup>1</sup> | O9   | Sn1              | 102.7 (3)   | O9               | Sn4  | O5               | 86.5 (2)    |
| Sn4              | O9   | Sn1              | 127.58 (16) | O9               | Sn4  | O6               | 88.7 (2)    |
| Sn4              | O9   | Sn1 <sup>1</sup> | 127.58 (16) | O9               | Sn4  | O6 <sup>1</sup>  | 88.7 (2)    |
| Sn2              | O10  | Sn3              | 105.0 (3)   | C11              | C12  | C13              | 105.9 (15)  |
| C5               | Sn1  | O3               | 94.1 (3)    | C11              | C12  | C14              | 111.9 (17)  |

**Table s5 Bond Angles for 221175lt\_auto.**

| Atom             | Atom | Atom             | Angle/°     | Atom         | Atom     | Atom | Angle/°    |
|------------------|------|------------------|-------------|--------------|----------|------|------------|
| C5               | Sn1  | O4               | 92.8 (3)    | C11          | C12      | C15  | 108.9 (15) |
| C5               | Sn1  | O7               | 93.2 (4)    | C14          | C12      | C13  | 111.9 (18) |
| C5               | Sn1  | Sn1 <sup>1</sup> | 140.9 (3)   | C14          | C12      | C15  | 108.0 (17) |
| O3               | Sn1  | Sn1 <sup>1</sup> | 76.98 (16)  | C15          | C12      | C13  | 110.2 (18) |
| O4               | Sn1  | O3               | 83.6 (2)    | C18          | C19      | C21  | 98.8 (18)  |
| O4               | Sn1  | Sn1 <sup>1</sup> | 123.15 (17) | C18          | C19      | C22  | 99.9 (18)  |
| O7               | Sn1  | O3               | 167.9 (2)   | C20          | C19      | C18  | 118.9 (17) |
| O7               | Sn1  | O4               | 86.4 (2)    | C20          | C19      | C21  | 117 (2)    |
| O7               | Sn1  | Sn1 <sup>1</sup> | 103.0 (2)   | C20          | C19      | C22  | 122 (2)    |
| O8               | Sn1  | C5               | 103.6 (3)   | C21          | C19      | C22  | 95.2 (16)  |
| O8               | Sn1  | O3               | 90.9 (3)    | C13AC12AC11  |          |      | 109.8 (15) |
| O8               | Sn1  | O4               | 163.1 (2)   | C14AC12AC11  |          |      | 109.7 (16) |
| O8               | Sn1  | O7               | 96.7 (3)    | C14AC12AC13A |          |      | 109.4 (17) |
| O8               | Sn1  | Sn1 <sup>1</sup> | 39.93 (14)  | C14AC12AC15A |          |      | 111.9 (19) |
| O9               | Sn1  | C5               | 178.7 (4)   | C15AC12AC11  |          |      | 109.0 (16) |
| O9               | Sn1  | O3               | 84.6 (2)    | C15AC12AC13A |          |      | 107.0 (17) |
| O9               | Sn1  | O4               | 87.2 (2)    | C18          | C19AC21A |      | 97.7 (17)  |
| O9               | Sn1  | O7               | 88.1 (3)    | C18          | C19AC22A |      | 101.3 (18) |
| O9               | Sn1  | O8               | 76.3 (2)    | C20AC19AC18  |          |      | 116 (2)    |
| O9               | Sn1  | Sn1 <sup>1</sup> | 38.65 (15)  | C20AC19AC21A |          |      | 116 (2)    |
| Cl1 <sup>1</sup> | Sn2  | Cl1              | 99.44 (12)  | C20AC19AC22A |          |      | 124 (2)    |
| O1               | Sn2  | Cl1 <sup>1</sup> | 88.00 (15)  | C21AC19AC22A |          |      | 96.5 (17)  |
| O1               | Sn2  | Cl1              | 88.00 (15)  |              |          |      |            |

<sup>1</sup>+X,1/2-Y,+Z

**Table s6 Torsion Angles for 221175lt\_auto.**

| A  | B  | C  | D   | Angle/°     | A  | B   | C        | D   | Angle/°    |
|----|----|----|-----|-------------|----|-----|----------|-----|------------|
| C2 | C1 | O1 | Sn2 | 180.000 (1) | O5 | C11 | C12      | C14 | 51.4 (18)  |
| C2 | C1 | O2 | Sn3 | 180.000 (1) | O5 | C11 | C12      | C15 | -67.8 (17) |
| C8 | C7 | O3 | Sn1 | -170.6 (6)  | O5 | C11 | C12AC13A |     | 118.7 (14) |
| O1 | C1 | C2 | C3  | 0.000 (2)   | O5 | C11 | C12AC14A |     | -2 (2)     |

**Table s6 Torsion Angles for 221175lt\_auto.**

| A               | B           | C   | D               | Angle/°     | A         | B           | C        | D | Angle/°     |
|-----------------|-------------|-----|-----------------|-------------|-----------|-------------|----------|---|-------------|
| O1              | C1          | C2  | C4A             | -157.3 (17) | O5        | C11         | C12AC15A |   | -124.4 (14) |
| O1              | C1          | C2  | C4              | -97.9 (16)  | O6        | C18O7       | Sn1      |   | -14 (3)     |
| O1              | C1          | O2  | Sn3             | 0.000 (2)   | O6        | C18C19      | C20      |   | 87 (2)      |
| O2              | C1          | C2  | C3              | 180.000 (1) | O6        | C18C19      | C21      |   | -41 (2)     |
| O2              | C1          | C2  | C4A             | 22.7 (17)   | O6        | C18C19      | C22      |   | -138.1 (19) |
| O2              | C1          | C2  | C4              | 82.1 (16)   | O6        | C18C19AC20A |          |   | -60 (2)     |
| O2              | C1          | O1  | Sn2             | 0.000 (2)   | O6        | C18C19AC21A |          |   | 64 (2)      |
| O3 <sup>1</sup> | C7          | C8  | C9              | 30.0 (12)   | O6        | C18C19AC22A |          |   | 162.6 (16)  |
| O3              | C7          | C8  | C9              | -154.4 (8)  | O7        | C18O6       | Sn4      |   | -18 (3)     |
| O3 <sup>1</sup> | C7          | C8  | C9 <sup>1</sup> | 154.4 (8)   | O7        | C18C19      | C20      |   | -68 (2)     |
| O3              | C7          | C8  | C9 <sup>1</sup> | -30.0 (12)  | O7        | C18C19      | C21      |   | 163.8 (14)  |
| O3              | C7          | C8  | C10             | 87.8 (8)    | O7        | C18C19      | C22      |   | 66.9 (18)   |
| O3 <sup>1</sup> | C7          | C8  | C10             | -87.8 (8)   | O7        | C18C19AC20A |          |   | 102 (2)     |
| O3 <sup>1</sup> | C7          | O3  | Sn1             | 4.7 (15)    | O7        | C18C19AC21A |          |   | -133.2 (19) |
| O4              | C11O5       |     | Sn4             | -15.9 (12)  | O7        | C18C19AC22A |          |   | -35 (2)     |
| O4              | C11C12      | C13 |                 | -10.5 (19)  | C12       | C11O4       | Sn1      |   | 158.5 (10)  |
| O4              | C11C12      | C14 |                 | -132.7 (16) | C12       | C11O5       | Sn4      |   | 159.9 (9)   |
| O4              | C11C12      | C15 |                 | 108.1 (16)  | C19       | C18O6       | Sn4      |   | -168.2 (12) |
| O4              | C11C12AC13A |     |                 | -58.9 (16)  | C19       | C18O7       | Sn1      |   | 140.3 (10)  |
| O4              | C11C12AC14A |     |                 | -179.2 (14) | C12AC11O4 |             | Sn1      |   | 151.4 (10)  |
| O4              | C11C12AC15A |     |                 | 57.9 (17)   | C12AC11O5 |             | Sn4      |   | 166.7 (10)  |
| O5              | C11O4       |     | Sn1             | -26.2 (14)  | C19AC18O6 |             | Sn4      |   | 143.7 (13)  |
| O5              | C11C12      | C13 |                 | 173.6 (13)  | C19AC18O7 |             | Sn1      |   | -174.5 (13) |

<sup>1</sup>+X,1/2-Y,+Z**Table s7 Hydrogen Atom Coordinates ( $\text{\AA}\times 10^4$ ) and Isotropic Displacement Parameters ( $\text{\AA}^2\times 10^3$ ) for 221175lt\_auto.**

| Atom | x       | y       | z       | U(eq) |
|------|---------|---------|---------|-------|
| H3A  | 1532.31 | 3033.25 | 2468.13 | 116   |
| H3B  | 1725.88 | 2082.13 | 2670.58 | 116   |
| H3C  | 831.18  | 2384.63 | 1734.84 | 116   |

**Table s7 Hydrogen Atom Coordinates ( $\text{\AA}\times 10^4$ ) and Isotropic Displacement Parameters ( $\text{\AA}^2\times 10^3$ ) for 221175lt\_auto.**

| Atom | <i>x</i> | <i>y</i> | <i>z</i> | U(eq) |
|------|----------|----------|----------|-------|
| H5   | 6552.26  | 4766.04  | 5262.66  | 56    |
| H6A  | 8412.59  | 4377.93  | 4512.45  | 71    |
| H6B  | 7493.19  | 5129.4   | 4188.41  | 71    |
| H9A  | 10889.47 | 1251.87  | 5116.41  | 71    |
| H9B  | 11716.81 | 1747.17  | 4602.38  | 71    |
| H9C  | 10356.76 | 1706.91  | 4143.15  | 71    |
| H10A | 12427.16 | 2646.88  | 6161.6   | 96    |
| H10B | 11696.22 | 1957.56  | 6528.49  | 96    |
| H10C | 11424.81 | 2895.56  | 6664.72  | 96    |
| H16  | 9870.11  | 2500     | 10166.93 | 61    |
| H17A | 7657.48  | 2500     | 10222.28 | 70    |
| H17B | 8820.52  | 2500     | 11096.28 | 70    |
| H13A | 10318.11 | 5096.08  | 6856.54  | 93    |
| H13B | 11175.71 | 5650.78  | 7612.51  | 93    |
| H13C | 9818.05  | 5661.3   | 7555.13  | 93    |
| H14A | 11865.25 | 3796.27  | 8808.86  | 82    |
| H14B | 12397.67 | 4658.73  | 8635.82  | 82    |
| H14C | 11935.65 | 4055.05  | 7770.73  | 82    |
| H15A | 9665.9   | 5106.81  | 9081.15  | 83    |
| H15B | 10980.44 | 5408.79  | 9347.48  | 83    |
| H15C | 10667.34 | 4509.8   | 9619.76  | 83    |
| H20A | 5757.31  | 5785.78  | 7892.54  | 132   |
| H20B | 6613.92  | 5390.81  | 7325.95  | 132   |
| H20C | 7001.97  | 5465.09  | 8447.43  | 132   |
| H21A | 6420.42  | 4319.51  | 9507.77  | 96    |
| H21B | 5379.56  | 3729.17  | 9026.31  | 96    |
| H21C | 5123.76  | 4657.01  | 9231.15  | 96    |
| H22A | 3974.08  | 4396.18  | 7837.62  | 105   |
| H22B | 4475.62  | 3724.43  | 7252.56  | 105   |
| H22C | 4269.97  | 4633.57  | 6861.87  | 105   |
| H13D | 11909.8  | 5116.61  | 7312.35  | 74    |
| H13E | 10622.39 | 5203.02  | 6673.25  | 74    |

**Table s7 Hydrogen Atom Coordinates ( $\text{\AA}\times 10^4$ ) and Isotropic Displacement Parameters ( $\text{\AA}^2\times 10^3$ ) for 221175lt\_auto.**

| Atom | <i>x</i> | <i>y</i> | <i>z</i> | U(eq) |
|------|----------|----------|----------|-------|
| H13F | 11217.76 | 4327.37  | 6848.86  | 74    |
| H14D | 11972.9  | 4013.46  | 8707.03  | 73    |
| H14E | 11324.76 | 4474.36  | 9394.78  | 73    |
| H14F | 12217.45 | 4956.57  | 8934.72  | 73    |
| H15D | 10673.77 | 5979.02  | 8277.51  | 86    |
| H15E | 9753.61  | 5494.28  | 8704.65  | 86    |
| H15F | 9486.55  | 5676.33  | 7599.89  | 86    |
| H20D | 5405.41  | 2852.05  | 8878.85  | 150   |
| H20E | 4433.62  | 2892.97  | 7912.58  | 150   |
| H20F | 4263.22  | 3381.58  | 8814.29  | 150   |
| H21D | 5434.78  | 4781.52  | 9318.7   | 102   |
| H21E | 6374.28  | 5015.95  | 8745     | 102   |
| H21F | 6621.41  | 4285.48  | 9487.22  | 102   |
| H22D | 4338.03  | 4351.83  | 6824.41  | 96    |
| H22E | 5300.56  | 5007.59  | 7281.23  | 96    |
| H22F | 4169.81  | 4906.46  | 7679.03  | 96    |
| H4AA | 3178.85  | 2195.15  | 612.55   | 143   |
| H4AB | 1889.82  | 2541.07  | 285.93   | 143   |
| H4AC | 2107.2   | 1638.17  | 694.54   | 143   |
| H4A  | 1781.68  | 1275.73  | 956.39   | 165   |
| H4B  | 2373.51  | 1122.4   | 2044.68  | 165   |
| H4C  | 3159.62  | 1235.94  | 1308.39  | 165   |

**Table s8 Atomic Occupancy for 221175lt\_auto.**

| Atom | Occupancy  | Atom | Occupancy  | Atom | Occupancy  |
|------|------------|------|------------|------|------------|
| H3A  | 0.5        | H3B  | 0.5        | H3C  | 0.5        |
| H10A | 0.5        | H10B | 0.5        | H10C | 0.5        |
| C12  | 0.510 (13) | C13  | 0.510 (13) | H13A | 0.510 (13) |
| H13B | 0.510 (13) | H13C | 0.510 (13) | C14  | 0.510 (13) |
| H14A | 0.510 (13) | H14B | 0.510 (13) | H14C | 0.510 (13) |
| C15  | 0.510 (13) | H15A | 0.510 (13) | H15B | 0.510 (13) |

**Table s8 Atomic Occupancy for 221175lt\_auto.**

| <b>Atom</b> | <b>Occupancy</b> | <b>Atom</b> | <b>Occupancy</b> | <b>Atom</b> | <b>Occupancy</b> |
|-------------|------------------|-------------|------------------|-------------|------------------|
| H15C        | 0.510 (13)       | C19         | 0.511 (14)       | C20         | 0.511 (14)       |
| H20A        | 0.511 (14)       | H20B        | 0.511 (14)       | H20C        | 0.511 (14)       |
| C21         | 0.511 (14)       | H21A        | 0.511 (14)       | H21B        | 0.511 (14)       |
| H21C        | 0.511 (14)       | C22         | 0.511 (14)       | H22A        | 0.511 (14)       |
| H22B        | 0.511 (14)       | H22C        | 0.511 (14)       | C12A        | 0.490 (13)       |
| C13A        | 0.490 (13)       | H13D        | 0.490 (13)       | H13E        | 0.490 (13)       |
| H13F        | 0.490 (13)       | C14A        | 0.490 (13)       | H14D        | 0.490 (13)       |
| H14E        | 0.490 (13)       | H14F        | 0.490 (13)       | C15A        | 0.490 (13)       |
| H15D        | 0.490 (13)       | H15E        | 0.490 (13)       | H15F        | 0.490 (13)       |
| C19A        | 0.489 (14)       | C20A        | 0.489 (14)       | H20D        | 0.489 (14)       |
| H20E        | 0.489 (14)       | H20F        | 0.489 (14)       | C21A        | 0.489 (14)       |
| H21D        | 0.489 (14)       | H21E        | 0.489 (14)       | H21F        | 0.489 (14)       |
| C22A        | 0.489 (14)       | H22D        | 0.489 (14)       | H22E        | 0.489 (14)       |
| H22F        | 0.489 (14)       | C4A         | 0.52 (2)         | H4AA        | 0.52 (2)         |
| H4AB        | 0.52 (2)         | H4AC        | 0.52 (2)         | C4          | 0.48 (2)         |
| H4A         | 0.48 (2)         | H4B         | 0.48 (2)         | H4C         | 0.48 (2)         |

**Experimental**

Single crystals of C<sub>36</sub>H<sub>63</sub>Cl<sub>5</sub>O<sub>16</sub>Sn<sub>5</sub> [221175lt\_auto] were [ ]. A suitable crystal was selected and [ ] on a **XtaLAB Synergy R, DW system, HyPix-Arc 150** diffractometer. The crystal was kept at 100.01(10) K during data collection. Using Olex2 [1], the structure was solved with the SHELXT [2] structure solution program using Intrinsic Phasing and refined with the SHELXL [3] refinement package using Least Squares minimisation.

1. Dolomanov, O.V., Bourhis, L.J., Gildea, R.J., Howard, J.A.K. & Puschmann, H. (2009), *J. Appl. Cryst.* 42, 339-341.
2. Sheldrick, G.M. (2015). *Acta Cryst.* A71, 3-8.
3. Sheldrick, G.M. (2015). *Acta Cryst.* C71, 3-8.

**Crystal structure determination of [221175lt\_auto]**

**Crystal Data** for C<sub>36</sub>H<sub>63</sub>Cl<sub>5</sub>O<sub>16</sub>Sn<sub>5</sub> (*M* = 1522.56 g/mol): monoclinic, space group P2<sub>1</sub>/m (no. 11), *a* = 11.92010(10) Å, *b* = 16.4662(2) Å, *c* = 14.64400(10) Å, *β* = 103.9010(10)°, *V* = 2790.12(5) Å<sup>3</sup>, *Z* = 2, *T* = 100.01(10) K, *μ*(Cu Kα) = 20.239 mm<sup>-1</sup>, *D*<sub>calc</sub> = 1.812 g/cm<sup>3</sup>, 20553 reflections measured (6.218° ≤ 2θ ≤ 134.146°), 5167 unique (*R*<sub>int</sub> = 0.0471, *R*<sub>sigma</sub> = 0.0272) which were used in all calculations. The final *R*<sub>1</sub> was 0.0595 (*I* > 2σ(*I*)) and *wR*<sub>2</sub> was 0.1584 (all data).

**Refinement model description**



Number of restraints - 258, number of constraints - unknown.

Details:

1. Fixed Uiso

At 1.2 times of:

All C(H) groups, All C(H,H) groups

At 1.5 times of:

All C(H,H,H) groups

2. Rigid bond restraints

C12, C13, C14, C15, C12A, C13A, C14A, C15A

with sigma for 1-2 distances of 0.01 and sigma for 1-3 distances of 0.01

C19, C20, C21, C22, C19A, C20A, C21A, C22A

with sigma for 1-2 distances of 0.01 and sigma for 1-3 distances of 0.01

C4, C4A

with sigma for 1-2 distances of 0.01 and sigma for 1-3 distances of 0.01

3. Uiso/Uanis restraints and constraints

C12 ≈ C13 ≈ C14 ≈ C15 ≈ C12A ≈ C13A ≈ C14A ≈ C15A:

within 2A with sigma of 0.01 and sigma for terminal atoms of 0.02 within 2A

C19 ≈ C20 ≈ C21 ≈ C22 ≈ C19A ≈ C20A ≈ C21A ≈ C22A:

within 2A with sigma of 0.01 and sigma for terminal atoms of 0.02 within 2A

C4 ≈ C4A: within 2A with sigma of 0.01 and sigma for terminal atoms of 0.02

within 2A

Uanis(C2) ≈ Ueq, Uanis(C3) ≈ Ueq, Uanis(C7) ≈ Ueq, Uanis(C16) ≈

Ueq, Uanis(C17) ≈ Ueq: with sigma of 0.01 and sigma for terminal atoms of

0.02

4. Same fragment restrains

{C12, C13, C14, C15} sigma for 1-2: 0.02, 1-3: 0.04

as in

{C12A, C13A, C14A, C15A}

{C19, C20, C21, C22} sigma for 1-2: 0.02, 1-3: 0.04

as in

{C19A, C20A, C21A, C22A}

5. Others

Sof(C19A)=Sof(C20A)=Sof(H20D)=Sof(H20E)=Sof(H20F)=Sof(C21A)=Sof(H21D)=

Sof(H21E)=Sof(H21F)=Sof(C22A)=Sof(H22D)=Sof(H22E)=Sof(H22F)=1-FVAR(1)

Sof(C19)=Sof(C20)=Sof(H20A)=Sof(H20B)=Sof(H20C)=Sof(C21)=Sof(H21A)=Sof(H21B)=

Sof(H21C)=Sof(C22)=Sof(H22A)=Sof(H22B)=Sof(H22C)=FVAR(1)

Sof(C12A)=Sof(C13A)=Sof(H13D)=Sof(H13E)=Sof(H13F)=Sof(C14A)=Sof(H14D)=

Sof(H14E)=Sof(H14F)=Sof(C15A)=Sof(H15D)=Sof(H15E)=Sof(H15F)=1-FVAR(2)

Sof (C12)=Sof (C13)=Sof (H13A)=Sof (H13B)=Sof (H13C)=Sof (C14)=Sof (H14A)=Sof (H14B)=

Sof (H14C)=Sof (C15)=Sof (H15A)=Sof (H15B)=Sof (H15C)=FVAR (2)

Sof (C4A)=Sof (H4AA)=Sof (H4AB)=Sof (H4AC)=1-FVAR (3)

Sof (C4)=Sof (H4A)=Sof (H4B)=Sof (H4C)=FVAR (3)

Fixed Sof: H3A(0.5) H3B(0.5) H3C(0.5) H10A(0.5) H10B(0.5) H10C(0.5)

6.a Aromatic/amide H refined with riding coordinates:

C5 (H5), C16 (H16)

6.b X=CH2 refined with riding coordinates:

C6 (H6A, H6B), C17 (H17A, H17B)

6.c Idealised Me refined as rotating group:

C3 (H3A, H3B, H3C), C9 (H9A, H9B, H9C), C10 (H10A, H10B, H10C), C13 (H13A, H13B, H13C),  
C14 (H14A, H14B, H14C), C15 (H15A, H15B, H15C), C20 (H20A, H20B, H20C), C21 (H21A, H21B,  
H21C), C22 (H22A, H22B, H22C), C13A (H13D, H13E, H13F), C14A (H14D, H14E, H14F),  
C15A (H15D, H15E, H15F), C20A (H20D, H20E, H20F), C21A (H21D, H21E, H21F), C22A (H22D,  
H22E, H22F), C4A (H4AA, H4AB, H4AC), C4 (H4A, H4B, H4C)

This report has been created with Olex2, compiled on 2022.04.07 svn.rca3783a0 for OlexSys. Please [let us know](#) if there are any errors or if you would like to have additional features.

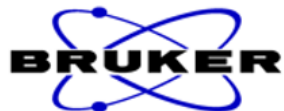

NAME Li  
EXPNO 1  
PROCNO 1  
Date\_ 20220816  
Time 11.37  
INSTRUM spect  
PROBHD 5 mm DUL 13C-1  
PULPROG zg30  
TD 32768  
SOLVENT CDCl3  
NS 32  
DS 0  
SWH 6410.256 Hz  
FIDRES 0.195625 Hz  
AQ 2.5559540 sec  
RG 812  
DW 78.000 usec  
DE 6.00 usec  
TE 300.0 K  
D1 2.00000000 sec  
TD0 1

===== CHANNEL f1 =====  
NUC1 1H  
P1 10.00 usec  
PL1 -2.40 dB  
SFO1 400.1528010 MHz  
SI 16384  
SF 400.1500179 MHz  
WDW EM  
SSB 0  
LB 0.00 Hz  
GB 0  
PC 1.00

7.240  
6.574  
6.544  
6.530  
6.495  
6.452  
6.422  
6.187  
6.139

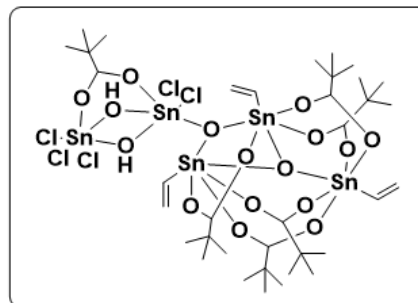

1.217

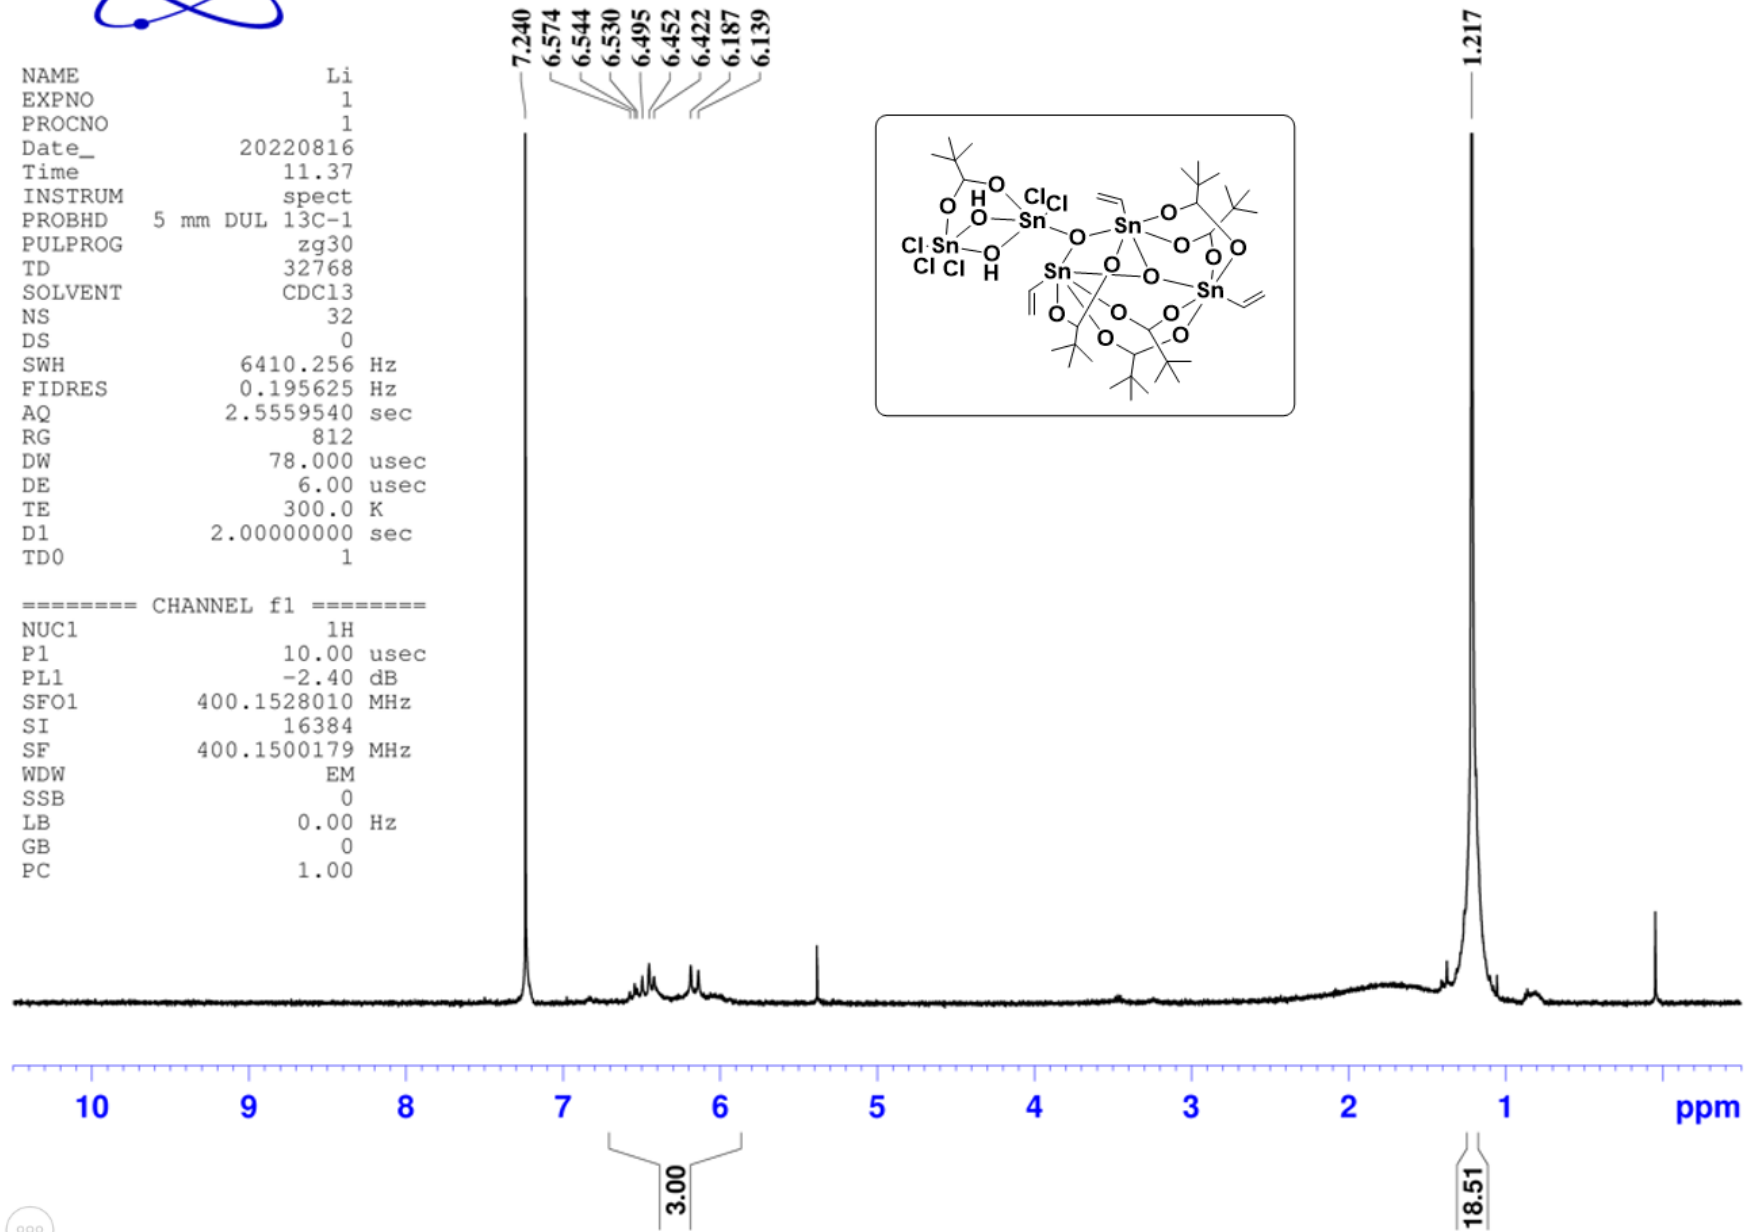

Figure S6. <sup>1</sup>H NMR of cluster 1



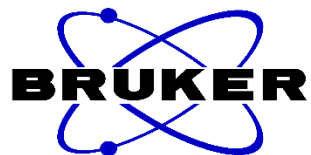

NAME liou240105.001  
EXPNO 2  
PROCNO 1  
Date\_ 20240108  
Time 23.10 h  
INSTRUM spect  
PROBHD Z119470\_0234 (  
PULPROG zgpg  
TD 65536  
SOLVENT CDCl3  
NS 8000  
DS 0  
SWH 750090.000 Hz  
FIDRES 22.888184 Hz  
AQ 0.0437407 sec  
RC 191.01  
DW 0.667 usec  
DE 6.50 usec  
TE 299.8 K  
D1 2.0000000 sec  
D11 0.0300000 sec  
TD0 1  
SFO1 186.5128250 MHz  
NUC1 119Sn  
P1 15.00 usec  
SI 32768  
SF 186.5128038 MHz  
WDW EM  
SSB 0  
LB 100.00 Hz  
GB 0  
PC 1.00

--- -32.99  
--- -188.73

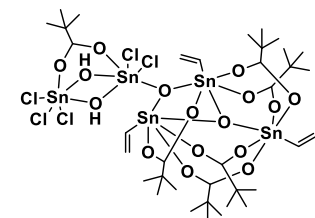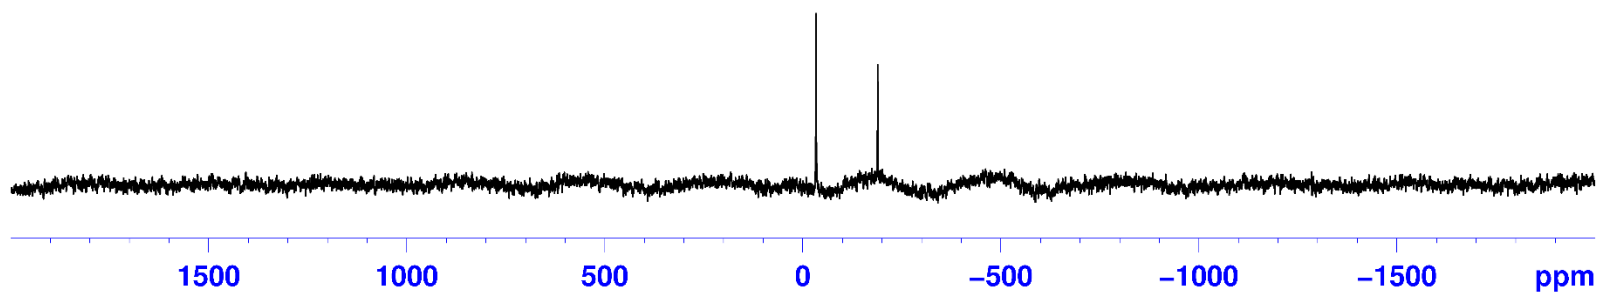

Figure S8. <sup>119</sup>Sn NMR of cluster 1

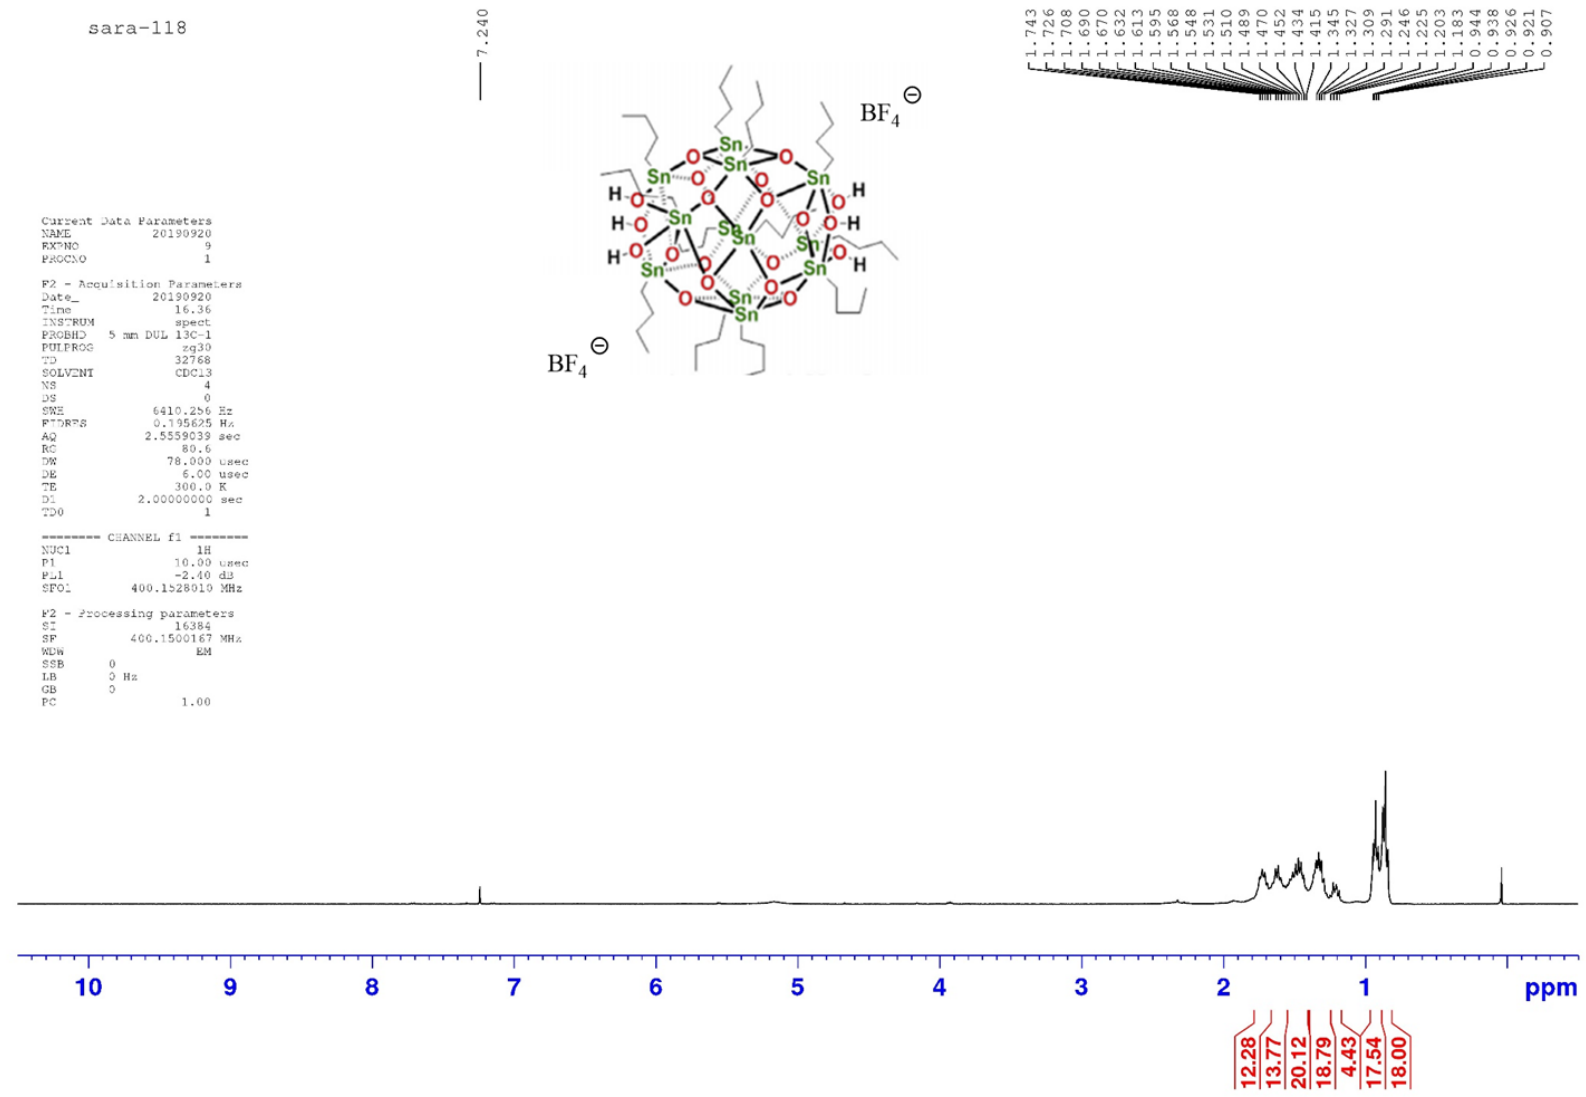

Figure S9. <sup>1</sup>H NMR of cluster 2

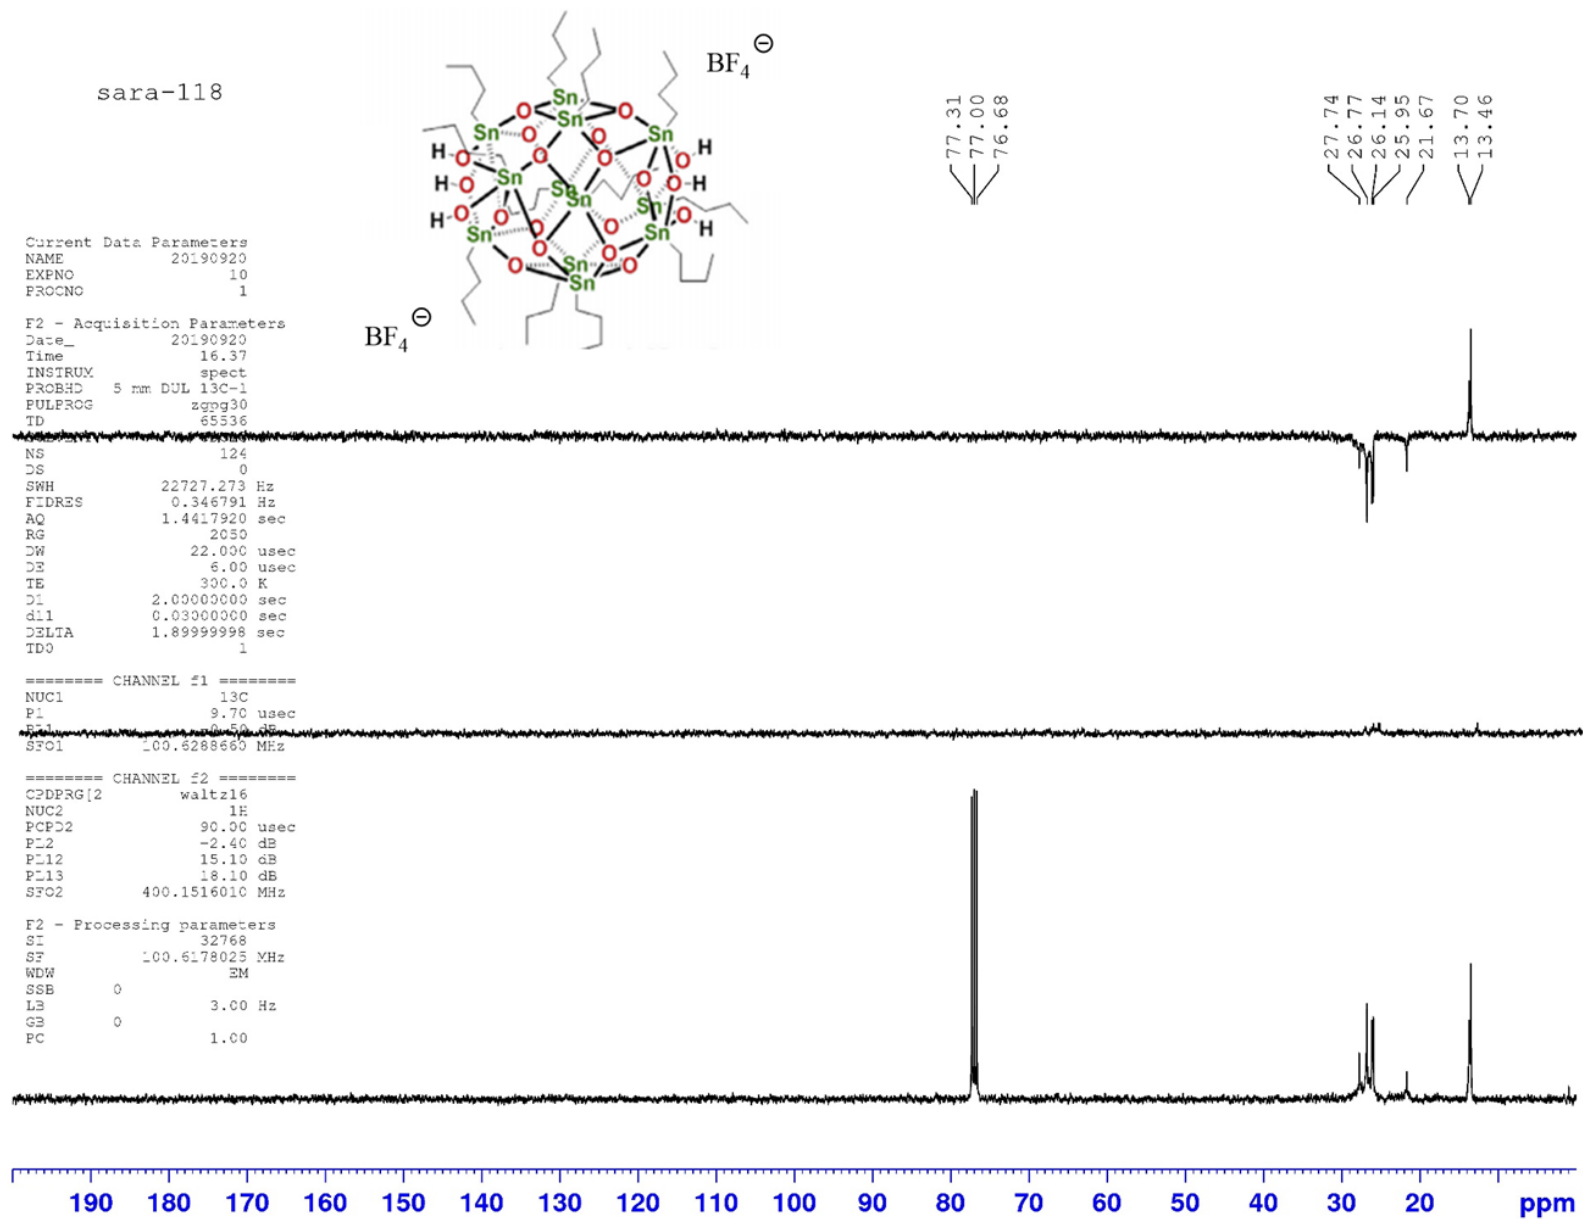

Figure S10.  $^{13}\text{C}$  NMR of cluster 2

Sara-118

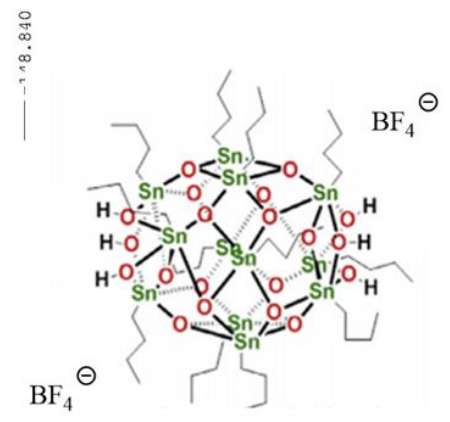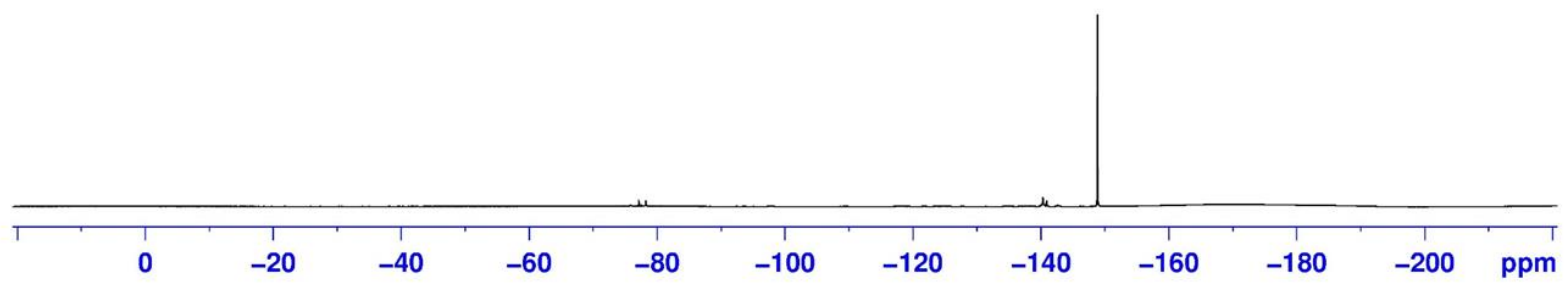

Figure S11.  $^{19}\text{F}$  NMR of cluster 2



Sara-118

-284.096  
-467.335

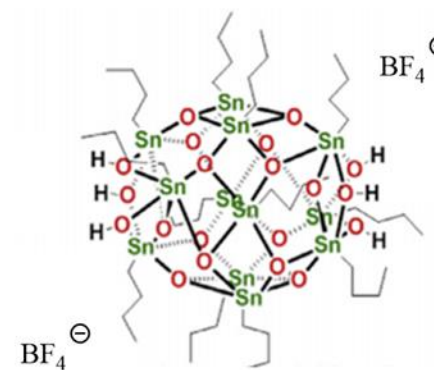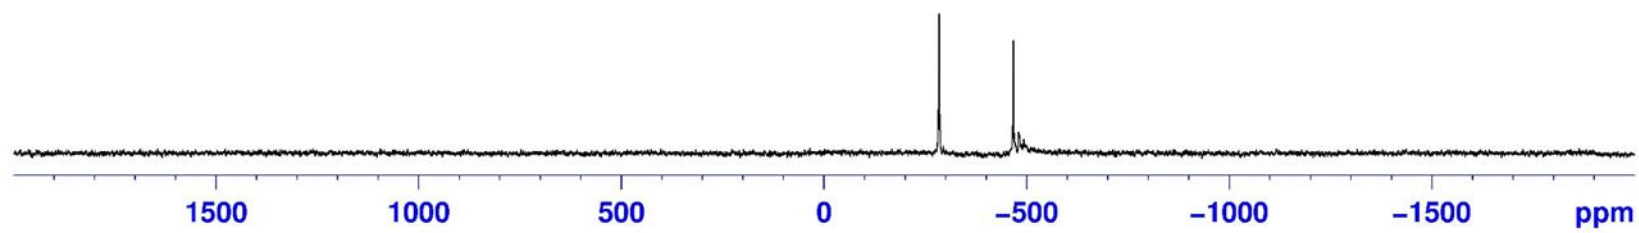

Figure S12. <sup>119</sup>Sn NMR of cluster 2
